# Supplementary material for: Proteomic Time-Course Analysis of the Filamentous Anoxygenic Phototrophic Bacterium, Chloroflexus aurantiacus, during the Transition from Respiration to Phototrophy
Source: MDPI journal article supplement (doi:10.3390/microorganisms10071288), 2022-06-25
Supplement: s1 [file s1]

Supplementary information for

# **Proteomic Time-Course Analysis of the Filamentous Anoxygenic Phototrophic Bacterium, *Chloroflexus aurantiacus*, during the Transition from Respiration to Phototrophy**

## **Authors**

Shigeru Kawai<sup>1,2,\*</sup>, Shigeru Shimamura<sup>1</sup>, Yasuhiro Shimane<sup>1,3</sup>, Yusuke Tsukatani<sup>1,\*</sup>

## **Affiliation**

<sup>1</sup>Institute for Extra-Cutting-Edge Science and Technology Avant-garde Research (X-star),  
Japan Agency for Marine-Earth Science and Technology (JAMSTEC), Yokosuka 237-  
0061, Japan

<sup>2</sup>Department of Biological Sciences, Hachioji Metropolitan University, Tokyo 192-0397,  
Japan

<sup>3</sup>Research Institute of Industrial Technology, Toyo University, Kawagoe 350-8585, Japan

\*Correspondence

Shigeru Kawai: [kawais@jamstec.go.jp](mailto:kawais@jamstec.go.jp)

Yusuke Tsukatani: [tsukatani@jamstec.go.jp](mailto:tsukatani@jamstec.go.jp)

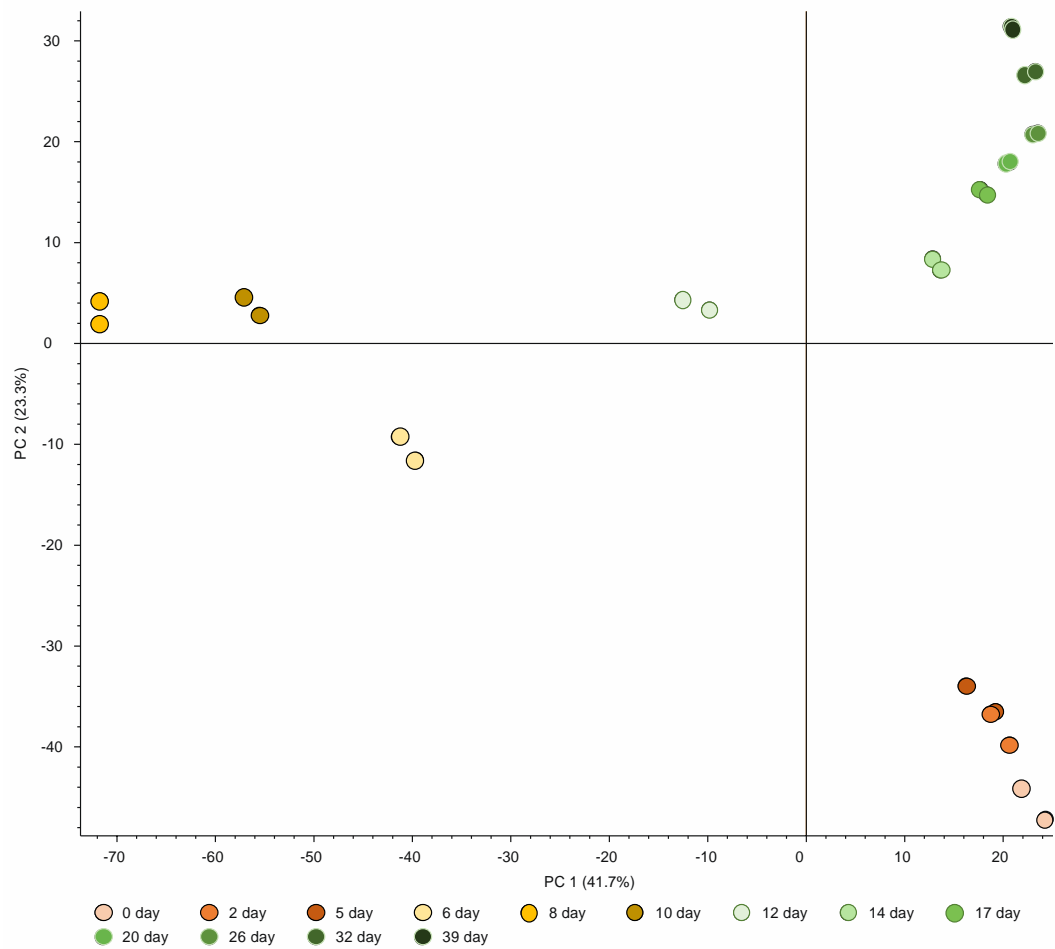

**Supplementary Figure S1. Principal component analysis of proteomic datasets.** Circles in the same color represent datasets from the same sampling date. Clustering of duplicate datasets in PCA indicates the two proteomic analyses are reproducible.

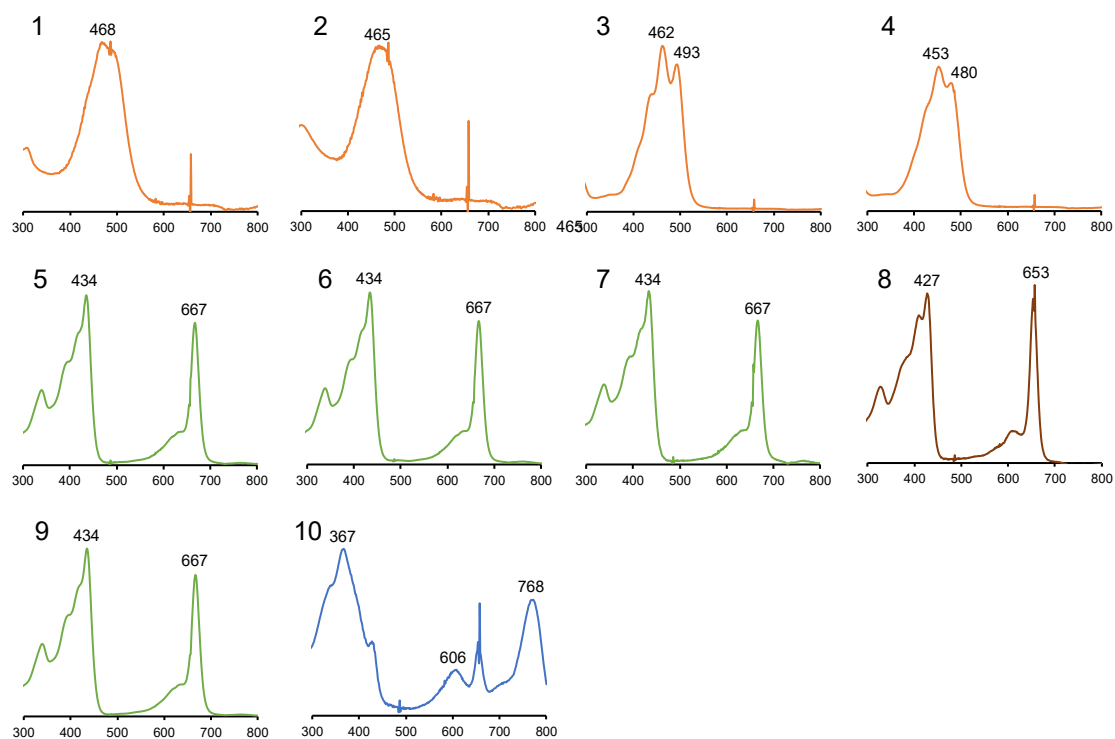

**Supplementary Figure S2. Absorption spectra of peaks detected in HPLC analysis.** Putative assignments of peaks are as follows: 1, 4-keto- $\gamma$ -carotene; 2, echinenone; 3,  $\gamma$ -carotene; 4,  $\beta$ -carotene; 5, 6, 7, and 9, BChl *c*; 8, BChl *d*; 10, BChl *a*.
